16 **ABSTRACT**

17 Switchgrass low-land ecotypes have significantly higher biomass but lower cold tolerance  
18 compared to up-land ecotypes. Understanding the molecular mechanisms underlying cold  
19 response, including the ones at transcriptional level, can contribute to improving tolerance of  
20 high-yield switchgrass under chilling and freezing environmental conditions. Here, by analyzing  
21 an existing switchgrass transcriptome dataset, the temporal *cis*-regulatory basis of switchgrass  
22 transcriptional response to cold is dissected computationally. We found that the number of cold-  
23 responsive genes and enriched Gene Ontology terms increased as duration of cold treatment  
24 increased from 30 min to 24 hours, suggesting an amplified response/cascading effect in cold-  
25 responsive gene expression. To identify genomic sequences likely important for regulating cold  
26 response, machine learning models predictive of cold response were established using *k*-mer  
27 sequences enriched in the genic and flanking regions of cold-responsive genes but not non-  
28 responsive genes. These *k*-mers, referred to as putative *cis*-regulatory elements (pCREs) are  
29 likely regulatory sequences of cold response in switchgrass. There are in total 655 pCREs where  
30 54 are important in all cold treatment time points. Consistent with this, eight of 35 known cold-  
31 responsive CREs were similar to top-ranked pCREs in the models and only these eight were  
32 important for predicting temporal cold response. More importantly, most of the top-ranked  
33 pCREs were novel sequences in cold regulation. Our findings suggest additional sequence  
34 elements important for cold-responsive regulation previously not known that warrant further  
35 studies.

36 **Key words:** Temporal transcriptional response, random forest classifier, regulation of cold  
37 stress, machine learning model interpretation, novel *cis*-regulatory sequences

## 38 INTRODUCTION

39 Switchgrass (*Panicum virgatum L.*) is a perennial C4 grass species native to North  
40 America and identified as a major lignocellulosic feedstock for biofuel production (Sanderson et  
41 al., 2006). Higher biomass production has been a major breeding target and a potent research  
42 area in switchgrass. However, high-yielding switchgrass cultivars grow in narrow climatic niches  
43 and are known to be less productive under drought, high salinity, and freezing/chilling  
44 environmental conditions (Lovell et al., 2021; Sage et al., 2015; Zhuo et al., 2015). Expanding  
45 the growing range of high-yielding switchgrass cultivars has been proposed as a way to achieve  
46 economic bioenergy production (Sanderson et al., 2006). Coupling high biomass production with  
47 low and freezing temperature tolerance can be an effective way of increasing the range  
48 expansion of high-yielding switchgrass cultivars. Thus, it is important to understand which genes  
49 and how they are responsive to cold stress in cold-resistant switchgrass cultivars.

50 The ability to tolerate and/or resist cold stress has been an active area of research with  
51 respect to the underlying genes, their transcriptional regulators, and signaling pathways (Manasa  
52 et al., 2021; Park et al., 2018; Thomashow, 2010). At the level of transcriptional regulation, the  
53 C-repeat-binding factor (CBF) cold response pathway is one of the best characterized. In  
54 *Arabidopsis thaliana*, three *C-Repeat Binding Factor/Dehydration Responsive Element-Binding*  
55 *Protein 1 (CBF/DREB1)* transcription factor (TF) genes are rapidly up-regulated in response to  
56 cold stress (Liu et al., 1998; Stockinger et al., 1997). Such rapid cold response is due to a  
57 signaling network that is active upon cold stress. During cold treatment, cellular  $Ca^{+2}$  is elevated  
58 and activates Calmodulin proteins (CAMs). CAMs then bind to promoters of *CAM-binding*  
59 *Transcription Activators (CAMTAs)* and up-regulate expression of *CAMTAs*. Finally, *CAMTAs*  
60 bind to the conserved CGCG-box in *CBF* genes and up-regulate their transcription. Another  
61 well-studied regulator of *CBF* expression is the *Inducer of CBF Expression (ICE)* (Chinnusamy  
62 et al., 2003). ICE TFs are activated through low temperature mediated sumoylation and  
63 subsequently bind to ICE-box promoters in *CBF* genes to activate its transcription (Chinnusamy  
64 et al., 2010, 2007, 2003). CBF TFs then up-regulate over 100 cold regulated (COR) and low-  
65 temperature induced genes by binding to C-repeat/dehydration-responsive (CRT/DRE) elements,  
66 located in promoters of COR genes (Thomashow, 2010). This regulatory hub is known as the  
67 CBF regulon which is a major mechanism of cold stress response regulation in plants.

68 Beyond the CBF regulatory hub, there are examples of other, non-CBF regulatory  
69 pathways important for cold stress response in plants. Studies using CBF mutants have shown  
70 that TFs rapidly responsive to cold, such as HSFC1, ZAT12, and CZF1, also regulate COR gene  
71 expression, indicating CBF-independent regulation (Liu et al., 2019; Park et al., 2018). Another  
72 example is BZR1 TFs in the brassinosteroid (BR) signaling pathway that become  
73 dephosphorylated upon exposure to cold stress and bind to BR responsive element and E-box in  
74 the promoter regions of COR genes such as *WRKY6*, *SAG21*, and *SOC1* (Li et al., 2017). It is  
75 also shown that cold-induced, Abscisic Acid modulated COR gene expression is also shown to  
76 work independently from CBF regulon (Liu et al., 1998). There are likely other, non-CBF  
77 regulatory mechanisms for plant cold-responsive transcription that remain to be discovered. In  
78 addition, in switchgrass, it remains unclear how temporal regulation of cold response is  
79 regulated, CBF-dependent or not.

80 Computational approaches are powerful tools in the identification of genome-wide  
81 regulatory patterns in plants under biotic and abiotic stress conditions. In switchgrass, co-  
82 expression analysis has been used to establish the potential transcriptional regulatory networks in  
83 heat, drought, and biotic stress conditions (Hayford et al., 2022; Pingault et al., 2020). Recently,  
84 a comprehensive, transcriptomic study on several panicoid grasses, including switchgrass,  
85 revealed that machine learning approaches can be implemented to predict cold stress responses  
86 of genes within and between species based on nucleotide frequencies in promoter regions of  
87 genes, among other features (Meng et al., 2021). Beyond nucleotide frequencies, a similar  
88 approach using longer nucleotide sequences (i.e., *k*-mers) can identify putative *cis*-regulatory  
89 elements that are regulatory switches of gene expression under cold stress in switchgrass. Such  
90 approaches have been applied to identify the regulatory switches of genes under wounding (Liu  
91 et al., 2018; Moore et al., 2022), salinity (Uygun et al., 2017), iron excess response (Kakei et al.,  
92 2021), heat, and drought stress conditions (Azodi et al., 2020).

93 In this study, we aim to apply a similar, machine-learning based approach in switchgrass  
94 to assess the involvement of CBF-dependent components of cold response regulation and  
95 identify other *cis*-regulatory mechanisms. Using an existing cold stress time course  
96 transcriptomes of switchgrass (Meng et al., 2021), we first identified temporally cold-responsive  
97 genes. To test the extent to which the temporal cold transcriptional response at different cold  
98 treatment duration can be explained using potential *cis*-regulatory sequences, we built machine  
99 learning models to predict genes that are up- and down-regulated upon cold treatment in the time  
100 course experiment using *k*-mers enriched among up- or down-regulated genes. The *k*-mers that  
101 were the most predictive for cold-responsive genes were considered putative *Cis*-Regulatory  
102 Elements (pCREs) controlling the temporal transcriptional response. To further reveal the  
103 regulatory logic behind the temporal transcriptional response, we examined transcription factors  
104 that may bind to pCREs, similarity between pCREs to known CREs, as well as functions of the  
105 genes that these pCREs are located on. In addition, to understand if there are common  
106 mechanisms underlying the transcriptional response at different time points after cold treatment,  
107 we assessed if pCREs identified in one time point were similar to the regulatory elements  
108 identified in other time points.

## 109 **RESULTS AND DISCUSSION**

### 110 **Temporal transcriptional response in switchgrass under cold stress**

111 Switchgrass genes responsive to cold stress at different treatment time points (0.5, 1, 3, 6,  
112 16, and 24 hrs) were identified using the transcriptome data from Meng et al, (2021) (**S1 table**).  
113 We found that the number of cold-responsive genes, regardless if they were responsive to cold at  
114 multiple time points or at a specific time point, increased as the duration of cold treatments (**S1A**  
115 **fig**). This observation is consistent with a cascading effect of transcriptional response over time,  
116 similar to responses to other biotic (Ikeuchi et al., 2017; Moore et al., 2022; Ren et al., 2008) and  
117 abiotic (Joshi et al., 2016; Ohama et al., 2016) stress conditions. This cascading effect could be  
118 because the key regulators are activated sequentially during the cold treatment (Ding et al.,  
119 2019a; Lamers et al., 2020). Moreover, as expected, more cold-responsive genes tend to be  
120 shared between adjacent time points compared with time points apart from each other (**S1A fig**).

121 To understand what functions the genes that are responsive to cold stress at different time  
122 points tend to have, we conducted Gene Ontology (GO) enrichment analysis (see **Methods, S1B**

123 **and C fig**). GO terms relevant to signaling and activity of transcription factors, such as protein  
124 phosphorylation and regulation of transcription, were enriched for genes up-regulated at earlier  
125 time points (i.e., 0.5 - 3 hrs, **S1B fig**). These early up-regulated genes may act as initial  
126 regulators of genes that are responsive to cold at later time points. Consistent with this, it is  
127 known that the accumulation of  $\text{Ca}^{+2}$  as a result of initial cold sensing activates the expression of  
128 calcium-dependent protein kinases (CDPKs), which in turn activate transcription factors that  
129 regulate downstream cold stress response (Chinnusamy et al., 2010; Knight and Knight, 2012).  
130 Moreover, GO terms such as glucan metabolism and trehalose biosynthesis were also found to be  
131 enriched at initial time points. These biological processes are known to be important in the initial  
132 cold acclimation in Arabidopsis (Maruyama et al., 2009; Miranda et al., 2007). The GO terms  
133 enriched in up-regulated genes at later time points (i.e., 6-24 hrs) may involve biological  
134 processes that are required to maintain the functionality of the plant under prolonged cold stress.  
135 For example, during prolonged cold stress an increase in plant respiration has been observed  
136 (Manasa et al., 2021). As a result of elevated respiration, plants tend to accumulate higher  
137 amounts of reactive oxidative species (ROS), followed by the transcription of genes that are  
138 responsive to oxidative stress (Wei et al., 2022). This is in line with the enriched GO terms for  
139 later cold-responsive genes, such as response to oxidative stress and metal ion transport. Thus,  
140 the results from GO enrichment analysis are also indicative of the cascading effect of temporal  
141 transcriptional response under cold stress in switchgrass, where initial responsive genes activate  
142 later cold-responsive genes that are involved in different physiological and metabolic processes  
143 to withstand cold stress conditions.

#### 144 **Putative *cis*-regulatory elements (pCREs) regulating temporal cold stress responses**

145 The cascading effect of temporal transcriptional response that we observed, as well as the  
146 differences between GO terms enriched in genes that were up-regulated at different time points,  
147 indicates that the transcriptional regulation differs among time points after cold treatment. To  
148 understand how cold-responsive genes are regulated at the *cis*-regulatory level, we first identified  
149 *k*-mers in the promoter and gene body regions that were enriched among cold-responsive genes  
150 at each time point. Then the enriched *k*-mers were used to establish a predictive model to  
151 distinguish cold-responsive genes from non-responsive genes for each time point with machine  
152 learning (see **Methods; Fig. 1A**). We calculated F-measure (F1 score) on the validation and test  
153 instances (held out before model training, see **Methods**). In our modeling setup, the F1 score  
154 ranges between one and zero, where one represents a model with perfect prediction, while a  
155 score ~0.5 indicates a model with predictions no better than random guesses. Among models  
156 distinguishing genes that are significantly up- or down-regulated from non-responsive genes at  
157 different time points, the F1s were all higher than random expectation ( $> 0.7$ ) (**Fig. 1B**),  
158 indicating that the sequence information (i.e., *k*-mers) was predictive of cold stress response at a  
159 time point.

160 Next, we asked what features (*k*-mers) were most predictive of the temporal cold stress  
161 response of genes with feature selection. By assessing the model performance improvement by  
162 adding features successively from the most to the least important, the minimal number of  
163 features required to reach 95% of the optimal model performance was identified for each time  
164 point model (**S2 fig**). The *k*-mers that met this criteria for each time point model were defined as  
165 pCREs (**S2 and S3 tables**). From here onwards, we focus on the pCREs predictive of up-  
166 regulated genes. Some of these pCREs were general across time points (**Fig. 2A**), which may



167 indicate: (1) the genes regulated by these pCREs are responsive to cold across time points;  
168 and/or (2) different genes that are responsive to cold stress at different time points are regulated  
169 by the same pCRE set. We should note that only 154 and 411 genes for up- and down-regulation  
170 across >4 time points, respectively. On the other hand, 16,414 and 16,911 genes are up- and  
171 down-regulated in >=1 time points. Considering that very few genes are commonly responsive  
172 across multiple time points, the first possibility is unlikely. Some other pCREs were time point-  
173 specific (**Fig. 2A**). The remaining pCREs were identified by models predicting genes up-  
174 regulated at 2~5, most of the time, disjointed time points (**S3 fig**).

### 175 **Known cold response regulation transcription factors likely bound to pCRE sites**

176 Previous studies have shown that there are some conserved CREs that control the  
177 expression of both early responsive transcription factors (TFs), such as CBF, and downstream  
178 cold-responsive genes (e.g., COR genes) that carry out the cold stress tolerance in plants  
179 (Chinnusamy et al., 2010; Ding et al., 2019b; Park et al., 2018; Thomashow, 2010). To see if our  
180 models have identified binding sites for these known regulators as well as novel CREs, we  
181 examined the similarities between the general and time point-specific pCREs and 35 known  
182 transcription factor binding motifs (TFBMs) in Arabidopsis using DAP-seq (O'Malley et al.,  
183 2016) and CISBP (Weirauch et al., 2014) datasets (**S3 table**). In addition, we collected 35 known  
184 TFs regulating plant cold stress response that have binding site information (**S4 table**). Some  
185 pCREs that are significantly more similar (see **Methods**) to binding sites of 11 out of 35 known  
186 TFs regulating cold response than the 95 percentile of TFBMs from TFs of the same families  
187 (**Fig. 2A**, see **Methods**). Two general pCREs were similar to the binding sites of CAMTA1 and  
188 CAMTA5 (orange and yellow in **Fig. 2B**). CAMTAs are known to be up-regulated by the  
189 activation of Ca<sup>+2</sup> dependent Calmodulin due to cold-induced Ca<sup>+2</sup> spike (Finkler et al., 2007;  
190 Manasa et al., 2021). In addition, CAMTAs are major regulators of *CBF* genes that are known  
191 regulators of cold responses, for the immediate cold stress response (Finkler et al., 2007).  
192 Consistent with the involvement of CAMTAs in early cold response, pCREs the most closely  
193 related to CAMTA binding motifs had the highest feature importance in the 30 min model  
194 (CAMTA1 and CAMTA5 ranked 17 and 6, respectively). We should point out that the  
195 CAMTA1/5 binding motif-like pCREs were also found in 1hr- and 16 hr-specific sets, indicating  
196 that, like in Arabidopsis (Doherty et al., 2009) the CAMTAs may also be involved in  
197 maintaining *CBF* or other cold response gene expression that are critical for overall cold  
198 acclimation in switchgrass. Because only 11 of 35 cold CREs of known plant cold stress TFs  
199 have similar binding sites to general and specific pCREs (**Fig. 2A**), we next examined if they  
200 could be recovered using pCREs important in >1 time points (non-specific pCREs, **S3 table**).  
201 We found that no new cold CREs can be recovered. Thus, in later discussion, we mainly focus  
202 on general and time point-specific pCREs only.

203 Another notable finding is that pCREs are similar to ERF binding sites (gray and green in  
204 **Fig. 2A and B**) and were identified both in the general and most of the time point-specific pCRE  
205 sets (excluding the 3 and 6-hrs). Like CBF/DREB TFs, ERF TFs are members of  
206 APETALA2/Ethylene Responsive Element Binding Protein (AP2/EREBP) gene family which  
207 are known to be involved in multiple stress tolerance (Dey and Corina Vlot, 2015; Park et al.,  
208 2021). ERF115 prevents water deprivation in rice under extreme temperatures and drought  
209 conditions (Park et al., 2021). Dehydration is a condition that can occur under cold stress and  
210 transgenic switchgrass with higher water retention also has an increased cold tolerance (Xie et

211 al., 2019). Despite the lack of experimental evidence for the function of ERF TFs in switchgrass,  
212 our findings suggest that ERF TFs may play important roles in cold tolerance in switchgrass.  
213 Moreover, there were also pCREs that are similar to binding sites of TFs from other TFs  
214 families, such as WRKY, BZR and ABR. pCREs similar to binding sites for BZR1 (rank 1 to 4),  
215 WRKY24 (rank seven to eight), and WRKY 30 (rank seven) were also among the most  
216 predictive cold-CREs in cold-TFBM models (**S4 fig**). These TFs are known for cold signal  
217 transduction and cold stress tolerance via CBF-independent pathways (Park et al., 2015; Ramirez  
218 and Poppenberger, 2020). BZR1 is known to be involved in cold stress tolerance through  
219 processes such as ROS scavenging (Ramirez and Poppenberger, 2020) and facilitating structural  
220 changes in cell membranes and cell walls (Benatti et al., 2012). Moreover, WRKY TFs are also  
221 known to be involved in phytohormonal-induced signal transduction for low-temperature  
222 tolerance in plants (Park et al., 2018, 2015). ABR1 on the other hand is known to regulate stress  
223 responses including cold stress in a CBF-independent, CBL9-CIPK3-mediated, ABA-signaling  
224 cascade (Pandey et al., 2005). These findings indicate that our prediction models can not only  
225 predict cold-responsiveness for different time points after cold treatment, but also recover known  
226 plant cold-TFBMs.

### 227 **Potentially novel cold *cis*-regulatory sequences in switchgrass**

228 While known TFs involved in cold-responsive regulation can be identified, 45 pCREs  
229 either resembled known TFBMs but the TFs were not known to be involved in cold-regulation.  
230 Perhaps more importantly, another 598 pCREs did not have significant similarity to known  
231 TFBMs. This raises the question if these pCREs not resembling cold-TFBMs, represent novel  
232 component of switchgrass *cis*-regulation under cold treatment. To address this, we compared the  
233 informativeness of pCREs identified by our models and the experimentally validated cold-  
234 TFBMs for predicting cold stress response. Based on literature search, 35 TFs involved in cold  
235 response regulation with binding site information in different plant species (**S4 table**) were used  
236 to build models (hereafter referred to as cold-TFBM models). We found that the cold-TFBM  
237 models had far worse prediction performance (median F1=0.66) than models built using all  
238 pCREs (median F1=0.85, **Fig. 3A**). Since these 11 of 35 cold-TFBMs are significantly similar to  
239 top-ranked pCREs (similarity >95% of randomly expected matches, see **Methods**), it is not  
240 particularly surprising that the cold-TFBMs predictive of cold responsiveness at different  
241 specific time points are similar to the findings in **Fig. 2**. By looking at the feature importance of  
242 the cold-TFBMs models built for each of the time points (**S4 fig**), TFBMs of CAMTA1/5 and  
243 CBFs were among the most predictive features among the cold-TFBMs time point models.

244 While the all-pCRE models overall performed significantly better than cold-TFBM-based  
245 ones (T-test,  $p < 0.01$ , **Fig. 3A**), it is possible that the all-pCRE models simply have far more  
246 features. To address this, we also built models using the top 35 most important pCREs (based on  
247 the feature importance of time point models) for comparison. We found that the cold-TFBM  
248 models remain worse than models built using the top 35 pCREs (median F1=0.77,  $p < 0.01$ , **Fig.**  
249 **3A**). This finding, together with that based on all-pCRE models, suggests that pCREs identified  
250 in our models contain potentially novel cold-responsive CREs that may or may not be specific to  
251 switchgrass. In **Fig. 3B**, the top 10 ranked pCREs from each of the time point models are shown  
252 with emphasis on novel pCREs. These novel pCREs are significantly enriched (multiple testing  
253 corrected,  $p < 0.05$ ) in cold stress up-regulated genes at each time point (Median log odds  
254 ratio=0.55). Taken together, the comparison between cold-TFBM models and the all-pCRE or

255 the top-35 pCRE models shows that known cold-TFBMs could not explain cold responsiveness  
256 at any particular time point as well. These findings suggest that there are novel temporal *cis*-  
257 regulatory components of cold transcriptional response.

## 258 **Relationships between pCREs across time points**

259 The majority of top pCREs are sequences that do not resemble TFBMs associated with  
260 cold regulation. To further understand how these pCREs we identified may be involved in  
261 temporal cold stress regulation, we examined: (1) the similarity of the pCREs across time point  
262 models (**Fig. 4A**); (2) importance of pCREs from different clusters in predicting cold response  
263 (**Fig. 4B**); (3) functions carried out by the genes that the pCREs were located (**Fig. 4C**); (4)  
264 sequence similarities between pCREs and TFBMs (earlier the focus was only on cold-related  
265 TFs, **Fig. 4D**); and (5) expression profiles of genes that the pCREs were located (**Fig. 4E**). First,  
266 we categorized the pCREs into clusters by calculating the pairwise PCC distance (1-PCC) based  
267 on their sequences (see **Methods; S5 fig**). The clusters were defined using the same PCC  
268 distance threshold as in (Liu et al., 2018), where pCREs with PCC distance <0.39 were  
269 considered to be bound by TFs of the same family. The pCREs were grouped into 27 clusters and  
270 pCREs in 25 clusters were shared by >1 cold treatment time points. Since pCREs in a cluster are  
271 likely bound by TFs of the same family, this finding indicates the involvement of most TF  
272 families across time points. These clusters consisted of pCREs important in >1 time points were  
273 referred to as non-specific pCRE clusters (**Fig. 4A**).

274 To assess if pCREs in different clusters may regulate distinct sets of genes, we compared  
275 the differential expression profiles of genes that contain pCREs from different clusters in  
276 different time points (**Fig. 4E** and **S6 fig**). To facilitate interpretation of the differential  
277 expression profiles, we encoded the transcriptional responsiveness of a gene at a time point as U,  
278 D, N if it is significantly up-regulated, significantly down-regulated, and not differentially  
279 expressed, respectively. For example, a profile of “UDDNN” indicates that the gene is  
280 significantly up-regulated at 30 minutes and 1 hr, down-regulated at 3 hrs and 6 hrs, and not  
281 differentially expressed at 16 hrs and 24 hrs after cold treatment. Using this strategy, we  
282 investigated the frequency of differential expression profiles of genes with pCREs in different  
283 pCRE clusters. NNNUUN, NNNUUU, and NNUUUU were the top three most frequent  
284 expression profiles found on the genes that contain pCREs in all 25 non-specific pCRE clusters  
285 (**S7 fig**). Because the up-regulatory patterns were contiguous after 3hrs of cold treatment,  
286 regulatory switches common between time points may have a role in the up-regulation and  
287 maintaining the expression of genes at later time points. Similarly, previous studies also show  
288 that in both CBF-dependent and independent pathways, immediately cold-responsive TFs are  
289 responsible for up-regulating and maintaining the expression of a large number of downstream  
290 cold-responsive genes by binding to conserved regulatory sequences (Li et al., 2017; Park et al.,  
291 2015; Thomashow, 2010). Some genes harboring pCREs from non-specific pCRE clusters also  
292 had unique expression profiles (expressed in a single time point) as well as much more complex  
293 expression profiles (up- or down-regulated in multiple, non-contiguous time points) (**S6 and S7**  
294 **fig**).

295 In addition to non-specific clusters, there were two 30 min-specific pCRE clusters  
296 (clusters 23 and 25) (**Fig. 4A**). pCREs in these clusters may regulate initial cold transcriptional  
297 response. However, these clusters were significantly enriched ( $q \leq 0.05$ ) with the genes that are



298 up-regulated only at the 30-min time point compared to genes that contain pCREs in other  
299 clusters (**S8 fig**). For example, in cluster 23, UNNNNN, UNUUNN, UNUNNU, UUUUUU,  
300 UUUUUU, and UUNNDD are among profiles with the highest degrees of enrichment. There are  
301 ~360 different gene expression profiles that contain pCREs in all 25 of the shared pCRE clusters  
302 (**S7 fig**). Thus, the temporal regulation of cold transcriptional response is likely mediated through  
303 a combination of general CREs that are important for the entire duration, specific CREs that  
304 regulates response at particular time, as well as non-specific CREs that regulate a certain  
305 duration (contiguous time points) or complicated expression profiles (e.g., UNUNNU). To  
306 assess the functions of genes that contained pCREs from pCREs clusters, we examined which  
307 GO terms were enriched with genes containing pCREs in a cluster (**Fig. 4C**). Except for the  
308 general enriched GO terms (e.g., metabolic processes), genes containing pCREs of non-specific  
309 pCRE clusters were enriched with biosynthetic processes that are involved in cold stress  
310 responses (e.g., fatty acid biosynthetic process, lipid biosynthetic process, and trehalose  
311 biosynthetic process) and specific metabolic processes (e.g., response to oxidative stress,  
312 carbohydrate metabolic process) (**Fig. 4C**). These GO terms are known to be enriched in late  
313 responsive genes under cold stress (Manasa et al., 2021). Our findings suggest that some genes  
314 containing pCREs from these non-specific pCRE clusters may contribute to metabolic processes  
315 crucial for cold tolerance. None of the GO terms were enriched for genes containing pCREs in  
316 the specific pCRE clusters 23 and 25, potentially due to the small sample size of these two  
317 clusters.

#### 318 **Cold stress regulatory pCREs that do not resemble known TFBMs**

319 To further assess the regulatory role of the pCREs in pCRE clusters, we asked what TFs  
320 may bind to these pCREs using the in-vitro TFBM information of 344 Arabidopsis TFs.  
321 Although the Arabidopsis and the switchgrass lineages diverged ~200 million years ago (Wolfe  
322 et al., 1989), the TFBMs of dicot and monocot TFs from the same families are highly similar  
323 (Weirauch et al., 2014). A TF was considered to have the potential to bind to a pCRE if the  
324 similarity between its TFBM and the pCRE in question was above the 95<sup>th</sup> percentile of the  
325 similarity distribution calculated among TFBMs in the same TF family (see **Methods**). In  
326 addition to members of the AP2-EREBP family discussed previously (**Fig. 2 and 4C**), TFBMs of  
327 B3, bZIP, MYB, Trihelix, and FAR1 TF families were also found to have a significant similarity  
328 to pCREs in multiple clusters (**Fig. 4C**). In soybean, the bZIP TFs are known to regulate cold  
329 stress in ABA-dependent pathways by inducing the expression of downstream COR and ERF  
330 type genes that help plants to resist cold stress conditions (Liao et al., 2008; Yu et al., 2020).  
331 Moreover, in tomatoes, the Trihelix type TFs are known to be up-regulated under cold stress  
332 conditions, and activate downstream genes with products that modulate stomatal conductance to  
333 prevent water loss (Liu et al., 2012; Yu et al., 2018). In apples, R2R3-MYB TFs were found to  
334 be induced by cold stress and activate ROS scavenging genes (An et al., 2018).

335 Aside from 19 clusters containing pCREs resembling known Arabidopsis TFBMs, eight  
336 clusters did not contain pCREs resembling TFBMs we investigated (**Fig. 4B**). These pCREs are  
337 referred to as “unknown” pCREs (those with “between” threshold in **S3 table**). In our time-point  
338 models, those unknown pCREs were also important for predicting cold responsiveness of a gene  
339 (**S3 table**) as indicated by the median importance of pCREs in clusters (**Fig. 4C**). Furthermore,  
340 the feature importance ranks of these pCREs in predicting cold transcriptional response in the  
341 time point models (median rank=0.45) are significantly similar (T-test,  $p$ -value<0.01) to those of

342 pCREs resembling known TFBMs (median rank=0.38). Using general pCREs as examples, we  
343 built models to predict genes up-regulated at different time points using solely pCREs similar to  
344 known TFBMs (n=16), and another model with unknown pCREs (n=38). We found that the  
345 performances of models built using general pCREs similar to known TFBM (median F1=0.66)  
346 and general “unknown” pCREs (median F1=0.70) were not significantly different (T-test, *p*-  
347 value>0.01). This result also suggests that “unknown” pCREs have similar importance to pCREs  
348 that resemble known TFBMs in predicting temporal cold-stress response in switchgrass. The  
349 reasons we did not find similar TFBMs to these pCREs may be because the threshold we used to  
350 assign a pCRE to TFBSs was too stringent. However, the threshold used was established as the  
351 degree of similarity that allows binding motifs of a plant TF family to be identified (Azodi et al.,  
352 2020). Thus, it was not asking if a pCRE resembled a specific TFBM, but the binding motifs at  
353 the level of family. The second reason may be that Arabidopsis TFBMs were used, which may  
354 miss TFBMs specific in other species. Although there is broad conservation of TFBMs across  
355 species, even between plants and humans (Weirauch et al., 2014), this can only be assessed with  
356 additional experimental studies either through DAP-seq or one-hybrid assay. Another possibility  
357 is that the Arabidopsis TFBM data may miss binding sites due to the limitations of in vitro  
358 binding assays (Bartlett et al., 2017). Finally, it is also possible that, instead of TFBMs, a subset  
359 of pCREs may represent motifs relevant for levels of regulation beyond transcription, such as  
360 post-transcriptional or translational regulation. This possibility remains to be investigated.

361

## 362 CONCLUSION

363 In this study, we aimed to find DNA regulatory switches responsible for temporal  
364 transcriptional response in switchgrass under cold stress conditions. By examining the number of  
365 cold-responsive genes at different time points, and the functions these genes tend to have, we  
366 found a cascading effect of gene transcriptional responses with regards to the time the plant was  
367 exposed to cold stress. The *k*-mers enriched for cold-responsive genes at a particular time point  
368 were predictive of the cold responsiveness of genes at that time point. By examining the top most  
369 predictive *k*-mers, we were able to identify well known CREs that regulate cold stress response  
370 in plants, indicating the usefulness of our models. Based on similarity of a subset of pCREs to  
371 known cold TFs, switchgrass cold stress response is mediated through both CBF-dependent and  
372 independent pathways. Beyond the known cold-responsive CREs, additional pCREs not known  
373 to be regulating cold response were identified. Some pCREs were identified in specific time  
374 point models, while others (general and non-specific pCREs) appeared to be relevant to  
375 regulation of cold response at multiple, sometimes disjoint, time points. In the latter case,  
376 differential expression profiles of genes containing these pCREs show complex patterns  
377 throughout the time course.

378 A substantial fraction of the pCREs do not resemble known binding motifs of known cold  
379 response regulatory TFs or, in general, Arabidopsis TFs with in vivo binding data. However, the  
380 regulatory function of these pCREs in cold responses needs to be experimentally validated using  
381 knockout lines and additional efforts, including modeling complex expression patterns under  
382 cold stress response (i.e., non-contiguous, up-/down-regulation) to identify the pCREs  
383 responsible for complex temporal expression and modeling cold stress response using  
384 combinations of pCREs to identify complex expression patterns under cold stress are required to

385 fully understand the cold-responsive *cis*-regulatory code in switchgrass. We also emphasize how  
386 building computational methods and their interpretations are important for identifying the global  
387 patterns of gene expression and their context-specific regulatory elements. This study provides  
388 sequence elements that regulate temporal cold stress response, allows a systematic understanding  
389 of the temporal cold stress regulation in switchgrass and, with subsequent validation studies, the  
390 information can be used as the bases for fine tuning switchgrass tolerance to cold stress.

391

## 392 **MATERIALS AND METHODS**

### 393 **Transcriptome data collection, preprocessing, and gene-set enrichment analysis**

394 The switchgrass cold response RNA-seq data were from a published study of a time  
395 course (0.5, 1, 3, 6, 16, and 24 hrs) under cold treatment (6 °C) with paired control samples (29  
396 °C/23 °C in a 12-h/12-h day/night cycle) (Meng et al., 2021). Switchgrass transcriptomes under  
397 three other stress conditions were from three published studies [Dehydration ((Zhang et al.,  
398 2018)), salt ((Zhang et al., 2021)), and drought ((Zuo et al., 2018)]. The RNA-sequencing (RNA-  
399 seq) data of these studies were downloaded from NCBI-SRA database  
400 (<https://www.ncbi.nlm.nih.gov/sra>), processed, and used to generate raw counts and transcript  
401 abundance (transcripts per million, TPM) using an RNA-seq analysis pipeline  
402 ([https://github.com/ShiuLab/RNA-seq\\_data\\_processing.git](https://github.com/ShiuLab/RNA-seq_data_processing.git)). For mapping RNA-seq reads,  
403 *Panicum virgatum* v5.1 genome and the corresponding genome annotations were downloaded  
404 from the Joint Genome Institute (JGI) database (<https://jgi.doe.gov>). Only reads that were  
405 uniquely mapped to the genome were used. Differential expression of genes (fold change, FC)  
406 contrasting cold stress treatment and corresponding control at each time point and false  
407 discovery rate corrected *p*-values were calculated using the EdgeR package implemented in R  
408 (Robinson et al., 2010).

409 Gene Ontology (GO) annotations of switchgrass genes were downloaded from JGI Data  
410 Portal as of 07.08.2021 (<https://data.jgi.doe.gov>). Fisher's exact test was conducted to identify  
411 GO categories enriched in cold-responsive genes at each time point versus all the other genes in  
412 the genome. The resulting *p*-values were adjusted using the Benjamini-Hochberg method  
413 (Benjamini and Hochberg, 1995), and GO terms with adjusted *p*-values  $\leq 0.05$  were considered  
414 as enriched for cold-responsive genes  
415 ([https://github.com/ShiuLab/Manuscript\\_Code/tree/master/2022\\_switchgrass\\_cold\\_pCREs](https://github.com/ShiuLab/Manuscript_Code/tree/master/2022_switchgrass_cold_pCREs)). The  
416 GO enrichment analysis was also conducted for genes that contain pCREs from the same pCRE  
417 distance cluster versus all the genes in the genome (see next sections).

### 418 **Identification of cold-responsive putative *cis*-regulatory elements (pCREs)**

419 Cold-responsive genes were defined as genes that were either significantly up-regulated  
420 ( $\text{Log}_2\text{FC} \geq 1$  and adjusted  $p \leq 0.05$ ) or down-regulated ( $\text{Log}_2\text{FC} \leq -1$  and adjusted  $p \leq 0.05$ ) upon cold  
421 treatment at each time point. Genes were defined as non-responsive to cold at any of the six time  
422 points and nonresponsive to the other three stress conditions mentioned above ( $|\text{log}_2\text{FC}| < 0.5$   
423 and/or adjusted  $p > 0.05$ ). Here, stress conditions other than cold treatment were considered to  
424 define non-responsive genes, because previous studies have found that stress-responsive CREs  
425 could activate genes under multiple stress conditions (Azodi et al., 2020; Zou et al., 2011). Thus,  
426 contrasting the cold-responsive genes against genes that are not responsive to combined stresses

427 would allow us to identify the full scale of pCREs, i.e., both cold-stress-specific pCREs and  
428 pCREs responsible for multiple stress conditions including cold stress.

429 To identify pCREs, we applied a combination of a  $k$ -mer enrichment approach and  
430 machine learning. To avoid data leakage, for each time point, cold-responsive genes (up- or  
431 down-regulated after cold treatment) and non-responsive genes were split where 80% of the  
432 genes were used as the training set and 20% were the test set. The test set was set aside and was  
433 not used for any pCRE identification or modeling steps. For the  $k$ -mer enrichment step, genes in  
434 the training set were further split into five bins. For each bin, we first identified all possible  $k$ -  
435 mers ( $k=5-8$  nucleotides where a forward  $k$ -mer was considered as the same as its reverse  
436 complements) from 1kb upstream, gene body including 5' and 3' untranslated regions, and 1kb  
437 downstream regions of both cold-responsive and non-responsive genes.  $K$ -mers enriched for  
438 cold-responsive genes (Fisher's exact test adjusted  $p$ -value $<0.05$ ) were identified for each bin,  
439 and the  $k$ -mers commonly enriched among all five bins were used as features to establish  
440 machine learning models classifying cold-responsive genes (positive examples) and non-  
441 responsive genes (negative examples) in the training set.

442 To create a balanced training dataset (same numbers of positive and negative examples),  
443 genes in the minority class with fewer instances were randomly up-sampled using the Synthetic  
444 Minority Over-sampling Technique (Chawla et al., 2002). We also experimented with down-  
445 sampling where the majority class was randomly selected to match the number of minority class  
446 genes. Classification models were built for each time point to predict cold-responsive and non-  
447 cold responsive genes using the random forest algorithm (Breiman, 2001) grid search was  
448 conducted based on 60 hyperparameter combinations ('max\_depth': [3, 5, 10], 'max\_features':  
449 [0.1, 0.5, 'sqrt', 'log2', None], 'n\_estimators': [10, 100, 500, 1000]) in a five-fold cross-validation  
450 scheme where every gene was used in the validation set exactly once. The optimal  
451 hyperparameter set was selected based on F1 score of the validation set predictions. F1 measure  
452 is the harmonic mean of precision and recall. An "optimal" model for each time point was then  
453 built using all training instances with the optimal hyperparameters. The final model for each time  
454 point was then applied to predict the cold responsiveness of genes in the testing set and model  
455 performance was evaluated using F1 measure.

#### 456 **Selection of minimal pCRE sets as features and determining relationships between pCREs**

457 To identify the minimal number of features (enriched  $k$ -mers) that have a similar  
458 performance as the optimal model using all features to distinguish cold-responsive from non-  
459 responsive genes, features were selected based on Gini importance defined as the impurity  
460 difference of a node in the decision tree when the feature in question is used, a measure of the  
461 contribution of a feature for distinguishing the cold-responsive and non-responsive genes. New  
462 models use the training set again by increasing the numbers of features used, starting with just  
463 the top 10 important features and, for subsequent models, increasing the number of features by  
464 20 in order of decreasing feature importance. The trend line of the cross-validation F1 score  
465 against the number of features was fit with the Michaelis-Menten Equation. For each time point  
466 the minimal number of features was determined as where the fitted line had a near zero  
467 differential (e.g., the 30 min model, **S1 fig**), or where the F1 first reached 90% of the optimal  
468 model F1 if there was no clear plateau (e.g., the 30 min model, **S1 fig**). Features within the  
469 minimal set were designated as pCREs for the cold response at the time point in question. To



470 determine the similarity between pCREs, pairwise PCC distances between pCREs were  
471 calculated using the TAMO package (Gordon et al., 2005), implemented in R. The distance  
472 matrix was used to construct a UPGMA tree using average linkage in the library ‘cluster’ in R  
473 (Maechler et al., 2012). Sequence similarity of 0.39 was used as a threshold, such that pCREs  
474 with similarity >0.39 can be treated as a single pCRE (Liu et al., 2018). For each cluster of  
475 pCREs, the proportion of pCREs in different categories (general or time point-specific pCRE  
476 groups) were calculated using custom scripts  
477 ([https://github.com/ShiuLab/Manuscript\\_Code/tree/master/2022\\_switchgrass\\_cold\\_pCREs](https://github.com/ShiuLab/Manuscript_Code/tree/master/2022_switchgrass_cold_pCREs)).

#### 478 **Identification of transcription factors (TFs) with binding sites similar to pCREs**

479 The assessment of sequence similarity between pCREs and known transcription factor  
480 binding sites (TFBSs) was carried out using the Motif Discovery Pipeline  
481 (<https://github.com/ShiuLab/MotifDiscovery.git>) as described in (Azodi et al., 2020). For this  
482 analysis, only the pCREs responsible for up-regulation upon cold treatment were considered.  
483 Known TFBS data was retrieved from two datasets: (1) DNA Affinity Purification sequencing  
484 (DAP-seq) database, where *in-vitro* DNA binding assays were performed for 344 TFs in  
485 *Arabidopsis thaliana*; (2) Catalog of Inferred Sequence Binding Preferences (CIS-BP) database,  
486 where position frequency matrices (PFMs) for TFBS of 190 TFs (non-redundant TFBS with  
487 DAP-seq database) in *A. thaliana* were available (Weirauch et al., 2014). To assess the similarity  
488 between pCREs and TFBSs, the Pearson’s Correlation Coefficients (PCC) between the position  
489 weighted matrices (PWMs) of pCREs and PWMs of TFBSs were calculated as described in  
490 (Azodi et al., 2020). The top matching TFBS for each pCRE was reported in three threshold  
491 levels (same TF, same family, or significantly more similar than randomly expected) as  
492 described in (Azodi et al., 2020). To determine the similarity between pCRE and TFBMs for TFs  
493 regulating cold response, we checked if pCRE-TFBM PCC is higher than 95<sup>th</sup> percentile of the  
494 PCCs calculated among TFBMs of different transcription factors families. This is a mid-  
495 stringency threshold out of the three thresholds we used to find similarities between pCREs and  
496 TFBMs. Since we are using Arabidopsis TFBMs to identify similar binding sites of specific TFs  
497 switchgrass we wanted to use TFBMs with the highest similarity when compared with other  
498 families of TFs, which with a higher stringency threshold would not have been found. Using this  
499 mid-stringency threshold we will be able to say if a pCRE resembles a specific binding site of a  
500 particular TF in comparison with other TFs in different TF families.

501 To assess how well the binding sites of TFs known to regulate cold response might  
502 predict cold response, we collected known cold regulation TFs through a literature search (**S4**  
503 **table**). Using PWMs of binding sites of TFs known to regulate cold stress in plants (cold-CREs),  
504 we mapped similar binding sites in up-regulated genes in different time points. Based on  
505 absence/presence of cold-CREs in a gene we recreate feature tables for genes that are up-  
506 regulated in each time point. Using the similar machine learning methods used in the  
507 “**Identification of cold-responsive putative cis-regulatory elements**” section, we made models  
508 to predict cold responsiveness of a gene up-regulated in each time point using cold-TFBMs. The  
509 performance of these models were then compared to our original time point models.

510



## 511 **FIGURE LEGENDS**

512 **Figure 1:** Models predicting the cold responsiveness. **(A)** The overall procedure to model  
513 transcriptional response. Genes that are significantly up- or down-regulated at a cold treatment  
514 time point were used as positive examples, while genes not responsive to cold treatment at any  
515 time point and to other abiotic stresses (dehydration, salt, and drought) were used as negative  
516 examples. *k*-mers enriched in the gene body and flanking non-genic regions of the cold-  
517 responsive genes were used as predictors (features). RandomForest classifier was used to train  
518 models, and the model performance was evaluated using the F1 score. **(B)** Model performances  
519 (F1) on the cross-validation (CV) and test sets for each time point model distinguishing genes  
520 that were up- (top chart) or down-regulated (bottom chart) after cold treatment for a specific  
521 duration from non-responsive genes. The number of positive example genes used in each time-  
522 point model is shown in the parenthesis.

523

524 **Figure 2:** Interpretation of the temporal cold-responsiveness prediction models. **(A)** General and  
525 time point-specific pCREs and their similarities to known cold CREs. Heatmap in the left panel  
526 shows the relative importance of pCREs, short sequences in the middle indicate pCREs that are  
527 similar to CREs known to regulate cold response (cold-TFBMs), which are shown in the right  
528 panel. Color scale in blue represents min-max scaled Gini index calculated for features in a time  
529 point model; color scale in pink indicates similarities between pCREs and cold-TFBMs. **(B)**  
530 Transcription factors (TFs) that bind to the cold-TFBMs are shown with different colors, and the  
531 sequence logos of TF binding sites are shown in the rightmost panel. PCC: pearson correlation  
532 coefficient. TFBM: transcription factor binding motifs.

533

534 **Figure 3:** **(A)** Model performance comparison among models built using all the pCREs (blue),  
535 top 35 most important pCREs (cyan), and 35 known cold-TFBMs (hot pink). **(B)** Enrichments of  
536 top 10 pCREs in 0.5, 1, 3, 6, 16, 24 hr time point models (a-f respectively).

537

538 **Figure 4:** Properties of pCRE clusters which were defined based on sequence similarity. **(A)**  
539 Heatmap showing the distribution of general and time point-specific pCREs within a cluster.  
540 Color scale represents the percentage of general and time point-specific pCREs in each pCRE  
541 cluster. **(B)** Median importance of pCREs in a cluster. Cell color depicts median min-max scaled  
542 Gini index of the pCREs within each cluster. Gray color indicates that the pCRE is not used in  
543 the time point model in question. **(C)** Potential transcription factors (TFs) that could bind to  
544 pCREs in pCRE clusters based on the similarity between pCREs and TF binding sites (TFBS)  
545 information based on in-vitro binding assays. A TF was considered to bind a pCRE only if the  
546 PCC similarity between the pCRE and its binding sites was above the 95<sup>th</sup> percentile of the  
547 background PCC distribution, which was calculated among TFs in the same TF family. TF  
548 families that don't fall under this threshold were marked in gray. Color scale represents the  
549 percentage of pCREs within a pCRE cluster that showed significant similarity with TFBS. **(D)**  
550 Significantly enriched biological GO terms of genes containing pCREs in a pCRE cluster. Color  
551 scale represents the log<sub>10</sub>(odds ratio), for details, see **Methods**. **(E)** Differential expression of

552 genes that contain pCREs in clusters 3, 16, or 23 at different time points. Each row shows the  
553 profile of a gene, and color scale indicates  $\log_2(\text{FC})$ .

554

## 555 SUPPLEMENTAL FIGURE LEGENDS

556 **S1 figure:** Properties of cold-responsive genes at different time points. (A) Matrix showing the  
557 number of up-regulated (top left triangle) and down-regulated (bottom right triangle) genes at  
558 different time points after cold treatment. Color scale and number within the cell on the diagonal  
559 represent the count of time point-specific cold-responsive genes, while those in other cells  
560 indicate the number of responsive genes shared between two time points. For example, the  
561 number eight in the top left cell indicates that there are eight genes that are up-regulated at both  
562 30 min and 24 hrs. (B, C) Biological process GO terms that are significantly enriched ( $q \leq 0.05$ )  
563 for genes that are down-regulated (B) or up-regulated (C) at different time points. Color scale: -  
564  $\log_{10}(q)$  for over-representative GO terms, and  $\log_{10}(q)$  for under-representative GO terms.

565 **S2 figure:** Feature selection. Graphs show the relationship between the F1 score and the number  
566 of features in time point models distinguishing genes up-regulated (left panel) or down-regulated  
567 (right panel) after cold treatment from non-responsive genes. The trends were fitted using the  
568 Michaelis-Menten Equation.

569 **S3 figure:** pCREs that were identified by models that predicted genes up-regulated at 2~5 time  
570 points and their resemblances with known cold-CREs.

571 **S4 figure:** Heatmap showing feature importance in the cold-TFBM models. Color scale and  
572 number in the cell represents the importance rank of features that had positive Gini indexes, the  
573 darker color and smaller number, the more important a feature was. Gray color indicates that the  
574 Gini index for the feature was negative.

575 **S5 figure:** A dendrogram showing relationships among general and time point-specific pCREs  
576 based on sequence similarities. The dendrogram is clustered based on the similarity threshold of  
577 0.39.

578 **S6 figure:** Heatmaps showing the differential expression of genes that contain pCREs from  
579 different pCRE clusters at different time points after cold treatment. Color scale indicates log  
580 fold change values.

581 **S7 figure:** Frequency of expression profiles (e.g., NNUDNN, y-axis) that are shown by genes  
582 that contain pCREs of different pCRE clusters (x-axis). Color scale indicates  $\log_2(\text{counts})$  of  
583 genes showing the expression profile. U: up-regulated; D: down-regulated; N: non-responsive.

584 **S8 figure:** Heatmap showing enriched expression profiles (e.g., NNUDNN, y-axis) for genes  
585 that contain pCREs of a particular pCRE cluster (x-axis). The color scale represents the log odds  
586 ratio, which was calculated as ratios between positive and negative cases.

587

## 588 SUPPLEMENTAL TABLES

589 **S1 table:** Metadata of the transcriptome sequences used in this study.

590 **S2 table:** Number of features selected in the feature selection processes and the best threshold  
591 used in different time point models.

592 **S3 table:** Enrichment *p*-values, feature importance scores, feature importance ranks, and  
593 summary of the similarity between pCREs and in-vitro transcription factor binding site data of  
594 pCREs in different time point models.

595 **S4 table:** Information on Transcription Factor Binding Sites (TFBS) of the transcription factors  
596 that are known to regulate cold stress response. The table only includes the TFBS whose position  
597 weight matrix information was available.

598 \* TFs whose binding sites were similar to the pCRE recovered from our time point models.

599 <sup>Y</sup> Binding site information was not available in DAP-seq or CISBP datasets

## 600 **CONFLICT OF INTEREST**

601 The authors declare that the research was conducted in the absence of any commercial or  
602 financial relationships that could be construed as a potential conflict of interest.

## 603 **AUTHOR CONTRIBUTIONS**

604 TR, PW, and SS conceptualized and designed the study. TR and BB acquired and analyzed the  
605 data. TR, BB, and PW wrote the original draft of the manuscript. SS and PW supervised the  
606 study. All authors read, revised, and approved the final manuscript.

## 607 **FUNDING**

608 This work was mainly funded by the US Department of Energy Great Lakes Bioenergy Research  
609 Center (BER DE-SC0018409) and in part by the National Science Foundation (DGE-1828149;  
610 IOS-2107215; MCB-2210431).

## 611 **ACKNOWLEDGEMENT**

612 We thank Kenia Segura Abá, Melissa Lehti-Shiu, Serena Lotreck, and Ally Schumacher for their  
613 feedback on the figures and discussion. This work was mainly supported by the US Department  
614 of Energy Great Lakes Bioenergy Research Center (BER DE-SC0018409) and in part by the  
615 National Science Foundation (DGE-1828149; IOS-2107215; MCB-2210431) to SHS.

## 616 **REFERENCES**

- 617 An, J.-P., Li, R., Qu, F.-J., You, C.-X., Wang, X.-F., Hao, Y.-J., 2018. R2R3-MYB transcription  
618 factor MdMYB23 is involved in the cold tolerance and proanthocyanidin accumulation in  
619 apple. *Plant J.* 96, 562–577. <https://doi.org/10.1111/tpj.14050>
- 620 Azodi, C.B., Lloyd, J.P., Shiu, S.-H., 2020. The cis-regulatory codes of response to combined  
621 heat and drought stress in *Arabidopsis thaliana*. *NAR Genomics Bioinforma.* 2, lqaa049.  
622 <https://doi.org/10.1093/nargab/lqaa049>

- 623 Bartlett, A., O'Malley, R.C., Huang, S.C., Galli, M., Nery, J.R., Gallavotti, A., Ecker, J.R., 2017.  
624 Mapping genome-wide transcription factor binding sites using DAP-seq. *Nat. Protoc.* 12,  
625 1659–1672. <https://doi.org/10.1038/nprot.2017.055>
- 626 Benatti, M., Penning, B., Carpita, N., Mccann, M., 2012. We are good to grow: dynamic  
627 integration of cell wall architecture with the machinery of growth. *Front. Plant Sci.* 3.
- 628 Benjamini, Y., Hochberg, Y., 1995. Controlling the False Discovery Rate: A Practical and  
629 Powerful Approach to Multiple Testing. *J. R. Stat. Soc. Ser. B Methodol.* 57, 289–300.
- 630 Breiman, L., 2001. Random Forests. *Mach. Learn.* 45, 5–32.  
631 <https://doi.org/10.1023/A:1010933404324>
- 632 Chinnusamy, V., Ohta, M., Kanrar, S., Lee, B.-H., Hong, X., Agarwal, M., Zhu, J.-K., 2003.  
633 ICE1: a regulator of cold-induced transcriptome and freezing tolerance in *Arabidopsis*.  
634 *Genes Dev.* 17, 1043–1054. <https://doi.org/10.1101/gad.1077503>
- 635 Chinnusamy, V., Zhu, J., Zhu, J.-K., 2007. Cold stress regulation of gene expression in plants.  
636 *Trends Plant Sci.* 12, 444–451. <https://doi.org/10.1016/j.tplants.2007.07.002>
- 637 Chinnusamy, V., Zhu, J.-K., Sunkar, R., 2010. Gene regulation during cold stress acclimation in  
638 plants. *Methods Mol. Biol. Clifton NJ* 639, 39–55. [https://doi.org/10.1007/978-1-60761-702-0\\_3](https://doi.org/10.1007/978-1-60761-702-0_3)  
639
- 640 Dey, S., Corina Vlot, A., 2015. Ethylene responsive factors in the orchestration of stress  
641 responses in monocotyledonous plants. *Front. Plant Sci.* 6.
- 642 Ding, Y., Lv, J., Shi, Y., Gao, J., Hua, J., Song, C., Gong, Z., Yang, S., 2019a. EGR2  
643 phosphatase regulates OST1 kinase activity and freezing tolerance in *Arabidopsis*.  
644 *EMBO J.* 38, e99819. <https://doi.org/10.15252/embj.201899819>
- 645 Ding, Y., Shi, Y., Yang, S., 2019b. Advances and challenges in uncovering cold tolerance  
646 regulatory mechanisms in plants. *New Phytol.* 222, 1690–1704.  
647 <https://doi.org/10.1111/nph.15696>
- 648 Doherty, C.J., Van Buskirk, H.A., Myers, S.J., Thomashow, M.F., 2009. Roles for *Arabidopsis*  
649 CAMTA transcription factors in cold-regulated gene expression and freezing tolerance.  
650 *Plant Cell* 21, 972–984. <https://doi.org/10.1105/tpc.108.063958>
- 651 Finkler, A., Ashery-Padan, R., Fromm, H., 2007. CAMTAs: calmodulin-binding transcription  
652 activators from plants to human. *FEBS Lett.* 581, 3893–3898.  
653 <https://doi.org/10.1016/j.febslet.2007.07.051>
- 654 Gordon, D.B., Nekludova, L., McCallum, S., Fraenkel, E., 2005. TAMO: a flexible, object-  
655 oriented framework for analyzing transcriptional regulation using DNA-sequence motifs.  
656 *Bioinformatics* 21, 3164–3165. <https://doi.org/10.1093/bioinformatics/bti481>
- 657 Hayford, R.K., Serba, D.D., Xie, S., Ayyappan, V., Thimmapuram, J., Saha, M.C., Wu, C.H.,  
658 Kalavacharla, V.K., 2022. Global analysis of switchgrass (*Panicum virgatum L.*)  
659 transcriptomes in response to interactive effects of drought and heat stresses. *BMC Plant*  
660 *Biol.* 22, 107. <https://doi.org/10.1186/s12870-022-03477-0>

- 661 Ikeuchi, M., Iwase, A., Rymen, B., Lambolez, A., Kojima, M., Takebayashi, Y., Heyman, J.,  
662 Watanabe, S., Seo, M., De Veylder, L., Sakakibara, H., Sugimoto, K., 2017. Wounding  
663 triggers callus formation via dynamic hormonal and transcriptional changes. *Plant*  
664 *Physiol.* 175, 1158–1174. <https://doi.org/10.1104/pp.17.01035>
- 665 Joshi, R., Wani, S.H., Singh, B., Bohra, A., Dar, Z.A., Lone, A.A., Pareek, A., Singla-Pareek,  
666 S.L., 2016. transcription factors and plants response to drought stress: Current  
667 Understanding and Future Directions. *Front. Plant Sci.* 7.
- 668 Kakei, Y., Masuda, H., Nishizawa, N.K., Hattori, H., Aung, M.S., 2021. Elucidation of novel cis-  
669 regulatory elements and promoter structures involved in iron excess response  
670 mechanisms in rice using a bioinformatics Approach. *Front. Plant Sci.* 12.
- 671 Knight, M.R., Knight, H., 2012. Low-temperature perception leading to gene expression and  
672 cold tolerance in higher plants. *New Phytol.* 195, 737–751.  
673 <https://doi.org/10.1111/j.1469-8137.2012.04239.x>
- 674 Lamers, J., van der Meer, T., Testerink, C., 2020. How plants sense and respond to stressful  
675 environments[OPEN]. *Plant Physiol.* 182, 1624–1635.  
676 <https://doi.org/10.1104/pp.19.01464>
- 677 Li, H., Ye, K., Shi, Y., Cheng, J., Zhang, X., Yang, S., 2017. BZR1 Positively Regulates  
678 Freezing Tolerance via CBF-Dependent and CBF-Independent Pathways in *Arabidopsis*.  
679 *Mol. Plant* 10, 545–559. <https://doi.org/10.1016/j.molp.2017.01.004>
- 680 Liao, Y., Zou, H.-F., Wei, W., Hao, Y.-J., Tian, A.-G., Huang, J., Liu, Y.-F., Zhang, J.-S., Chen,  
681 S.-Y., 2008. Soybean GmbZIP44, GmbZIP62 and GmbZIP78 genes function as negative  
682 regulator of ABA signaling and confer salt and freezing tolerance in transgenic  
683 *Arabidopsis*. *Planta* 228, 225–240. <https://doi.org/10.1007/s00425-008-0731-3>
- 684 Liu, H., Ouyang, B., Zhang, J., Wang, T., Li, H., Zhang, Y., Yu, C., Ye, Z., 2012. Differential  
685 modulation of photosynthesis, signaling, and transcriptional regulation between tolerant  
686 and sensitive tomato genotypes under cold stress. *PLOS ONE* 7, e50785.  
687 <https://doi.org/10.1371/journal.pone.0050785>
- 688 Liu, M.-J., Sugimoto, K., Uygun, S., Panchy, N., Campbell, M.S., Yandell, M., Howe, G.A.,  
689 Shiu, S.-H., 2018. Regulatory divergence in wound-responsive gene expression between  
690 domesticated and wild tomato. *Plant Cell* 30, 1445–1460.  
691 <https://doi.org/10.1105/tpc.18.00194>
- 692 Liu, Q., Kasuga, M., Sakuma, Y., Abe, H., Miura, S., Yamaguchi-Shinozaki, K., Shinozaki, K.,  
693 1998. Two transcription factors, DREB1 and DREB2, with an EREBP/AP2 DNA binding  
694 domain separate two cellular signal transduction pathways in drought- and low-  
695 temperature-responsive gene expression, respectively, in *Arabidopsis*. *Plant Cell* 10,  
696 1391–1406. <https://doi.org/10.1105/tpc.10.8.1391>
- 697 Liu, Y., Dang, P., Liu, L., He, C., 2019. Cold acclimation by the CBF–COR pathway in a  
698 changing climate: Lessons from *Arabidopsis thaliana*. *Plant Cell Rep.* 38, 511–519.  
699 <https://doi.org/10.1007/s00299-019-02376-3>



- 700 Lovell, J.T., MacQueen, A.H., Mamidi, S., Bonnette, J., Jenkins, J., Napier, J.D., Sreedasyam,  
701 A., Healey, A., Session, A., Shu, S., Barry, K., Bonos, S., Boston, L., Daum, C.,  
702 Deshpande, S., Ewing, A., Grabowski, P.P., Haque, T., Harrison, M., Jiang, J., Kudrna,  
703 D., Lipzen, A., Pendergast, T.H., Plott, C., Qi, P., Saski, C.A., Shakirov, E.V., Sims, D.,  
704 Sharma, M., Sharma, R., Stewart, A., Singan, V.R., Tang, Y., Thibivillier, S., Webber, J.,  
705 Weng, X., Williams, M., Wu, G.A., Yoshinaga, Y., Zane, M., Zhang, L., Zhang, J.,  
706 Behrman, K.D., Boe, A.R., Fay, P.A., Fritschi, F.B., Jastrow, J.D., Lloyd-Reilley, J.,  
707 Martínez-Reyna, J.M., Matamala, R., Mitchell, R.B., Rouquette, F.M., Ronald, P., Saha,  
708 M., Tobias, C.M., Udvardi, M., Wing, R.A., Wu, Y., Bartley, L.E., Casler, M., Devos,  
709 K.M., Lowry, D.B., Rokhsar, D.S., Grimwood, J., Juenger, T.E., Schmutz, J., 2021.  
710 Genomic mechanisms of climate adaptation in polyploid bioenergy switchgrass. *Nature*  
711 590, 438–444. <https://doi.org/10.1038/s41586-020-03127-1>
- 712 Maechler, Rousseeuw, P., Struyf, A., Hubert, M., Hornik, K., 2012. Cluster: cluster analysis basics  
713 and extensions.
- 714 Manasa, L., Panigrahy, M., Panigrahi, K.C.S., Rout, G.R., 2021. Overview of Cold Stress  
715 Regulation in Plants. *Bot. Rev.* <https://doi.org/10.1007/s12229-021-09267-x>
- 716 Maruyama, K., Takeda, M., Kidokoro, S., Yamada, K., Sakuma, Y., Urano, K., Fujita, M.,  
717 Yoshiwara, K., Matsukura, S., Morishita, Y., Sasaki, R., Suzuki, H., Saito, K., Shibata,  
718 D., Shinozaki, K., Yamaguchi-Shinozaki, K., 2009. Metabolic pathways involved in cold  
719 acclimation identified by integrated analysis of metabolites and transcripts regulated by  
720 DREB1A and DREB2A. *Plant Physiol.* 150, 1972–1980.  
721 <https://doi.org/10.1104/pp.109.135327>
- 722 Meng, X., Liang, Z., Dai, X., Zhang, Y., Mahboub, S., Ngu, D.W., Roston, R.L., Schnable, J.C.,  
723 2021. Predicting transcriptional responses to cold stress across plant species. *Proc. Natl.*  
724 *Acad. Sci.* 118, e2026330118. <https://doi.org/10.1073/pnas.2026330118>
- 725 Miranda, J.A., Avonce, N., Suárez, R., Thevelein, J.M., Van Dijck, P., Iturriaga, G., 2007. A  
726 bifunctional TPS–TPP enzyme from yeast confers tolerance to multiple and extreme  
727 abiotic-stress conditions in transgenic *Arabidopsis*. *Planta* 226, 1411–1421.  
728 <https://doi.org/10.1007/s00425-007-0579-y>
- 729 Moore, B.M., Lee, Y.S., Wang, P., Azodi, C., Grotewold, E., Shiu, S.-H., 2022. Modeling  
730 temporal and hormonal regulation of plant transcriptional response to wounding. *Plant*  
731 *Cell* 34, 867–888. <https://doi.org/10.1093/plcell/koab287>
- 732 Ohama, N., Kusakabe, K., Mizoi, J., Zhao, H., Kidokoro, S., Koizumi, S., Takahashi, F., Ishida,  
733 T., Yanagisawa, S., Shinozaki, K., Yamaguchi-Shinozaki, K., 2016. The transcriptional  
734 cascade in the heat stress response of *Arabidopsis* is strictly regulated at the level of  
735 transcription factor expression. *Plant Cell* 28, 181–201.  
736 <https://doi.org/10.1105/tpc.15.00435>
- 737 O'Malley, R.C., Huang, S.C., Song, L., Lewsey, M.G., Bartlett, A., Nery, J.R., Galli, M.,  
738 Gallavotti, A., Ecker, J.R., 2016. Cistrome and Epicistrome features shape the regulatory  
739 dna landscape. *Cell* 165, 1280–1292. <https://doi.org/10.1016/j.cell.2016.04.038>

- 740 Pandey, G.K., Grant, J.J., Cheong, Y.H., Kim, B.G., Li, L., Luan, S., 2005. ABR1, an  
741 APETALA2-Domain transcription factor that functions as a repressor of ABA response  
742 in *Arabidopsis*. *Plant Physiol.* 139, 1185–1193. <https://doi.org/10.1104/pp.105.066324>
- 743 Park, S., Gilmour, S.J., Grumet, R., Thomashow, M.F., 2018. CBF-dependent and CBF-  
744 independent regulatory pathways contribute to the differences in freezing tolerance and  
745 cold-regulated gene expression of two *Arabidopsis* ecotypes locally adapted to sites in  
746 Sweden and Italy. *PLOS ONE* 13, e0207723.  
747 <https://doi.org/10.1371/journal.pone.0207723>
- 748 Park, S., Lee, C.-M., Doherty, C.J., Gilmour, S.J., Kim, Y., Thomashow, M.F., 2015. Regulation  
749 of the *Arabidopsis* CBF regulon by a complex low-temperature regulatory network. *Plant*  
750 *J.* 82, 193–207. <https://doi.org/10.1111/tpj.12796>
- 751 Park, S.-I., Kwon, H.J., Cho, M.H., Song, J.S., Kim, B.-G., Baek, J., Kim, S.L., Ji, H., Kwon, T.-  
752 R., Kim, K.-H., Yoon, I.S., 2021. The OsERF115/AP2EREBP110 transcription factor is  
753 involved in the multiple stress tolerance to heat and drought in rice plants. *Int. J. Mol.*  
754 *Sci.* 22, 7181. <https://doi.org/10.3390/ijms22137181>
- 755 Pingault, L., Palmer, N.A., Koch, K.G., Heng-Moss, T., Bradshaw, J., Seravalli, J., Twigg, P.G.,  
756 Louis, J., Sarath, G., 2020. differential defense responses of upland and lowland  
757 switchgrass cultivars to a cereal aphid pest.
- 758 Ramirez, V.E., Poppenberger, B., 2020. Modes of Brassinosteroid Activity in Cold Stress  
759 Tolerance. *Front. Plant Sci.* 11.
- 760 Ren, D., Liu, Y., Yang, K.-Y., Han, L., Mao, G., Glazebrook, J., Zhang, S., 2008. A fungal-  
761 responsive MAPK cascade regulates phytoalexin biosynthesis in *Arabidopsis*. *Proc. Natl.*  
762 *Acad. Sci.* 105, 5638–5643. <https://doi.org/10.1073/pnas.0711301105>
- 763 Robinson, M.D., McCarthy, D.J., Smyth, G.K., 2010. edgeR: a Bioconductor package for  
764 differential expression analysis of digital gene expression data. *Bioinformatics* 26, 139–  
765 140. <https://doi.org/10.1093/bioinformatics/btp616>
- 766 Sage, R.F., de Melo Peixoto, M., Friesen, P., Deen, B., 2015. C<sub>4</sub> bioenergy crops for cool  
767 climates, with special emphasis on perennial C<sub>4</sub> grasses. *J. Exp. Bot.* 66, 4195–4212.  
768 <https://doi.org/10.1093/jxb/erv123>
- 769 Sanderson, M.A., Adler, P.R., Boateng, A.A., Casler, M.D., Sarath, G., 2006. Switchgrass as a  
770 biofuels feedstock in the USA. *Can. J. Plant Sci.* 86, 1315–1325.  
771 <https://doi.org/10.4141/P06-136>
- 772 Stockinger, E.J., Gilmour, S.J., Thomashow, M.F., 1997. *Arabidopsis thaliana* CBF1 encodes an  
773 AP2 domain-containing transcriptional activator that binds to the *C-repeat/DRE*, a cis-  
774 acting DNA regulatory element that stimulates transcription in response to low  
775 temperature and water deficit. *Proc. Natl. Acad. Sci. U. S. A.* 94, 1035–1040.  
776 <https://doi.org/10.1073/pnas.94.3.1035>
- 777 Thomashow, M.F., 2010. Molecular Basis of Plant Cold Acclimation: Insights gained from  
778 studying the CBF cold response pathway. *Plant Physiol.* 154, 571–577.  
779 <https://doi.org/10.1104/pp.110.161794>

- 780 Uygun, S., Seddon, A.E., Azodi, C.B., Shiu, S.-H., 2017. Predictive Models of Spatial  
781 Transcriptional Response to High Salinity. *Plant Physiol.* 174, 450–464.  
782 <https://doi.org/10.1104/pp.16.01828>
- 783 Wei, Y., Chen, H., Wang, L., Zhao, Q., Wang, D., Zhang, T., 2022. Cold acclimation alleviates  
784 cold stress-induced PSII inhibition and oxidative damage in tobacco leaves. *Plant Signal.*  
785 *Behav.* 17, 2013638. <https://doi.org/10.1080/15592324.2021.2013638>
- 786 Weirauch, M.T., Yang, A., Albu, M., Cote, A.G., Montenegro-Montero, A., Drewe, P.,  
787 Najafabadi, H.S., Lambert, S.A., Mann, I., Cook, K., Zheng, H., Goity, A., van Bakel, H.,  
788 Lozano, J.-C., Galli, M., Lewsey, M.G., Huang, E., Mukherjee, T., Chen, X., Reece-  
789 Hoyes, J.S., Govindarajan, S., Shaulsky, G., Walhout, A.J.M., Bouget, F.-Y., Ratsch, G.,  
790 Larrondo, L.F., Ecker, J.R., Hughes, T.R., 2014. Determination and inference of  
791 eukaryotic transcription factor sequence specificity. *Cell* 158, 1431–1443.  
792 <https://doi.org/10.1016/j.cell.2014.08.009>
- 793 Wolfe, K.H., Gouy, M., Yang, Y.W., Sharp, P.M., Li, W.H., 1989. Date of the monocot-dicot  
794 divergence estimated from chloroplast DNA sequence data. *Proc. Natl. Acad. Sci.* 86,  
795 6201–6205. <https://doi.org/10.1073/pnas.86.16.6201>
- 796 Xie, Z., Lin, W., Yu, G., Cheng, Q., Xu, B., Huang, B., 2019. Improved cold tolerance in  
797 switchgrass by a novel CCCH-type zinc finger transcription factor gene, *PvC3H72*,  
798 associated with ICE1–CBF–COR regulon and ABA-responsive genes. *Biotechnol.*  
799 *Biofuels* 12, 224. <https://doi.org/10.1186/s13068-019-1564-y>
- 800 Yu, C., Song, L., Song, J., Ouyang, B., Guo, L., Shang, L., Wang, T., Li, H., Zhang, J., Ye, Z.,  
801 2018. *ShCIGT*, a Trihelix family gene, mediates cold and drought tolerance by interacting  
802 with *SnRK1* in tomato. *Plant Sci.* 270, 140–149.  
803 <https://doi.org/10.1016/j.plantsci.2018.02.012>
- 804 Yu, Y., Qian, Y., Jiang, M., Xu, J., Yang, J., Zhang, T., Gou, L., Pi, E., 2020. Regulation  
805 mechanisms of plant basic leucine zippers to various abiotic stresses. *Front. Plant Sci.* 11.
- 806 Zhang, C., Peng, X., Guo, X., Tang, G., Sun, F., Liu, S., Xi, Y., 2018. Transcriptional and  
807 physiological data reveal the dehydration memory behavior in switchgrass (*Panicum*  
808 *virgatum* L.). *Biotechnol. Biofuels* 11, 91. <https://doi.org/10.1186/s13068-018-1088-x>
- 809 Zhang, P., Duo, T., Wang, F., Zhang, X., Yang, Z., Hu, G., 2021. De novo transcriptome in roots  
810 of switchgrass (*Panicum virgatum* L.) reveals gene expression dynamic and act network  
811 under alkaline salt stress. *BMC Genomics* 22, 82. <https://doi.org/10.1186/s12864-021-07368-w>
- 813 Zhuo, Y., Zhang, Y., Xie, G., Xiong, S., 2015. Effects of salt stress on biomass and ash  
814 composition of switchgrass (*Panicum virgatum*). *Acta Agric. Scand. Sect. B — Soil Plant*  
815 *Sci.* 65, 300–309. <https://doi.org/10.1080/09064710.2015.1006670>
- 816 Zou, C., Sun, K., Mackaluso, J.D., Seddon, A.E., Jin, R., Thomashow, M.F., Shiu, S.-H., 2011.  
817 *Cis*-regulatory code of stress-responsive transcription in *Arabidopsis thaliana*. *Proc.*  
818 *Natl. Acad. Sci.* 108, 14992–14997. <https://doi.org/10.1073/pnas.1103202108>

819 Zuo, C., Tang, Y., Fu, H., Liu, Y., Zhang, X., Zhao, B., Xu, Y., 2018. Elucidation and analyses  
820 of the regulatory networks of upland and lowland ecotypes of switchgrass in response to  
821 drought and salt stresses. PLOS ONE 13, e0204426.  
822 <https://doi.org/10.1371/journal.pone.0204426>  
823

**Figure 1**

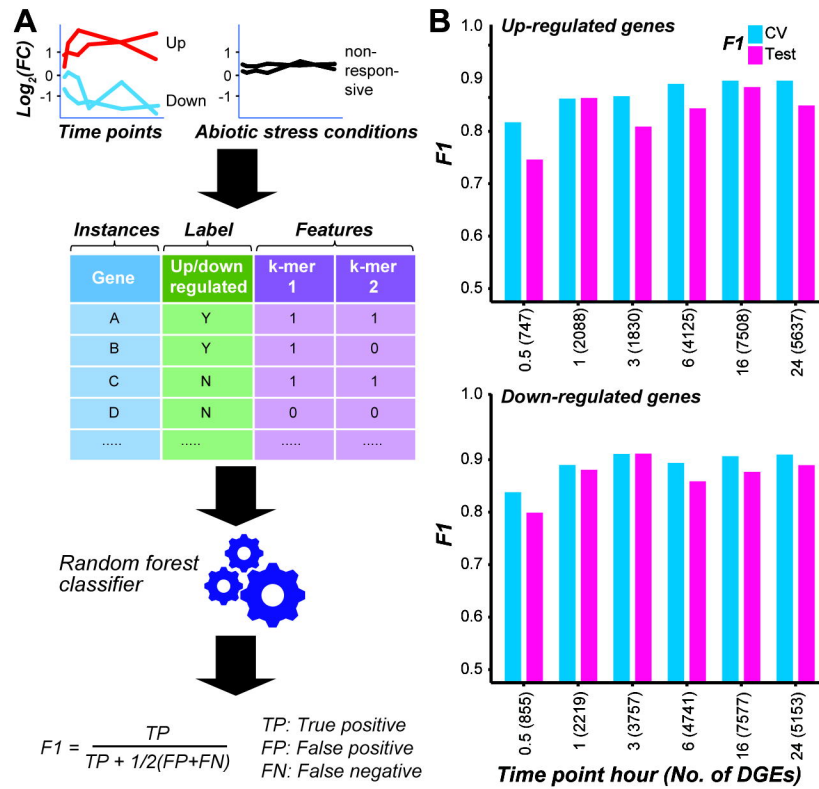



**Figure 2**

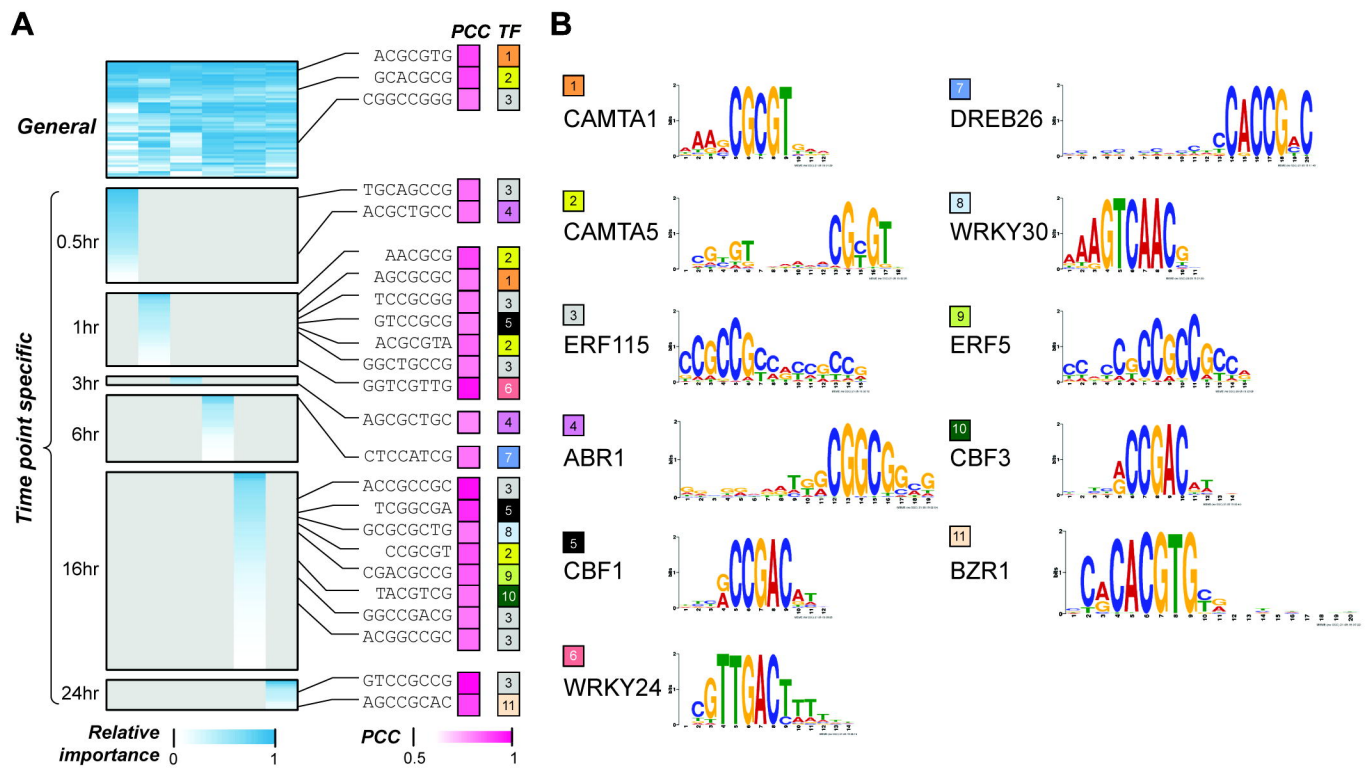

**Figure 3**

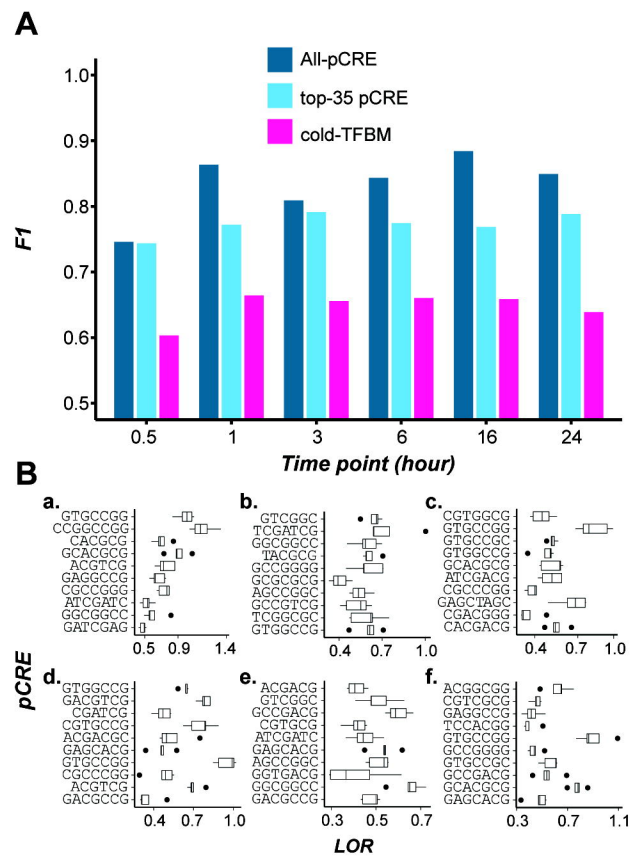

Source: https://www.biorxiv.org/content/10.1101/2022.08.01.502344v1.full.pdf
