# Supplementary material for: Temporal Regulation of Cold Transcriptional Response in Switchgrass
Source: bioRxiv or medRxiv preprint supplement (doi:10.1101/2022.08.01.502344), 2022-08-03

|   |   |   |   |   |   |         |
|---|---|---|---|---|---|---------|
| 1 | 1 | 2 | 1 | 1 | 1 | CAMTA5  |
| 4 | 4 | 3 | 3 | 2 | 2 | CBF1    |
| 6 | 3 | 4 | 6 | 5 | 3 | CAMTA1  |
|   |   |   |   |   |   | M02288  |
|   |   |   |   |   |   | ATHB20  |
| 2 | 2 | 1 | 2 | 4 | 4 | BZR1    |
| 3 | 5 | 6 | 4 | 3 | 5 | CBF3    |
|   |   |   |   |   |   | M01854  |
| 5 | 6 | 5 | 5 | 6 | 6 | CBF2    |
|   |   |   |   |   |   | ANAC062 |
| 7 | 8 | 7 | 7 |   | 7 | WRKY24  |
|   |   |   |   |   |   | MYB73   |
|   |   |   |   |   |   | M06800  |
|   |   |   |   |   |   | MYB44   |
|   |   |   |   |   |   | M02349  |
|   |   |   |   |   |   | M01622  |
|   |   |   |   |   |   | WRKY33  |
|   |   |   |   |   |   | RAV1    |
|   |   |   |   |   |   | M07115  |
|   | 7 |   |   |   |   | WRKY30  |
|   |   |   |   |   |   | M06799  |
|   |   |   |   |   |   | HSFC1   |
|   |   |   |   |   |   | M02303  |
|   |   |   |   |   |   | WRKY40  |
|   |   |   |   |   |   | M01633  |
|   |   |   |   |   |   | ERF11   |
|   |   |   |   |   |   | DREB26  |
|   |   |   |   |   |   | WRKY22  |
|   |   |   |   |   |   | ABR1    |
|   |   |   |   |   |   | ERF6    |
|   |   |   |   |   |   | ERF115  |
|   |   |   |   |   |   | ERF5    |
|   |   |   |   |   |   | M01859  |
|   |   |   |   |   |   | M00861  |
|   |   |   |   |   |   | M01852  |

30 min

1 hr

3 hr

6 hr

16 hr

24 hr

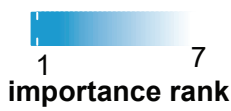

Supplement: Supplementary file [file media-8.pdf]
